# Supplementary material
Source: publisher figshare collection journal article supplement (https://gsajournals.figshare.com/ndownloader/files/28873740)
Supplement: Supplementary file 1 [file 28873740]

## Sheet: Feuil1
	Table S3 amino acid MLEs references used as references in the phylogenetic tree analysis search (ACcession number,Species,Group)
	MLE subfamily Irritans
	Name	AC.number	Species	Group
	Hkmar	XP_026320665.1	Hyposmocoma kahamanoa	Insect
	Avmar	GBN87365.1	Araneus ventricosus	Arachnid
	Agmar	XP_023310047.1	Anoplophora glabripennis	Insect
	Agmar1	XP_023310469.1	Anoplophora glabripennis	Insect
	Nlmar	XP_039280431.1	Nilaparvata lugens	Insect
	Gamar	XP_017621939.1	Gossypium arboreum	Cotton
	Lnmar	KMQ91440.1	Lasius niger	Insect
	MLE Subfamily Elegans
	Name	AC.number	Species
	Cemar	C29E6.6	Caenorhabditis elegans	Nematode
	Avmar	AAZ67099.1	Adineta vaga	Rotifer
	Avmar2	AAZ67098.1	Adineta vaga	Rotifer
	MLE Subfamily Cecropia
	Name	AC.number	Species
	Bmmar3	BAA23532.1	Bombyx mori	Insect
	Aamar	BAA21826.1	Attacus atlas	Insect
	MLE Subfamily Mellifera
	Name	AC.number	Species
	Ccmar2	AAO12864.1	Ceratitis capitata	Insect
	Famar1	AAO12863.1	Forficula auricularia	Insect
	Ammar1	AAO12861.1	Apis mellifera	Insect
	MLE Subfamily Mauritiana
	Name	AC.number	Species
	Lnmar1	KMQ87532.1	Lasius niger	Insect
	Csmar	PNF20350.1	Cryptotermes secundus	Insect
	Csmar1	PNF13663.1	Cryptotermes secundus	Insect
	Comar	KAG0720823.1	Chionoecetes opilio	crab
